# Supplementary material for: FUS/TLS acts as an aggregation-dependent modifier of polyglutamine disease model mice
Source: PubMed Central journal article supplement (PMC5064419; doi:10.1038/srep35236), 2016-10-14
Supplement: srep35236-s1.pdf [file srep35236-s1.pdf]

## **Supplemental Information**

**FUS/TLS acts as an aggregation-dependent modifier of polyglutamine disease model mice.**

Yoshihiro Kino, Chika Washizu, Masaru Kurosawa, Mizuki Yamada, Hiroshi Doi, Toru Takumi, Hiroaki Adachi, Masahisa Katsuno, Gen Sobue, Geoffrey G. Hicks, Nobutaka Hattori, Tomomi Shimogori, and Nobuyuki Nukina.

## Supplementary Methods

### Antibodies

Primary antibodies used in this study are listed below. Rabbit anti-TLS-M, anti-TLS-C, anti-EWS-M, anti-TAF15-M, and anti-Uqbln2 were described previously (Doi et al., 2004; Doi et al., 2008). Secondary antibodies were anti-mouse, anti-rabbit, anti-goat, or anti-Guinea pig IgG antibodies conjugated to Alexa-488, Alexa-546, or Alexa-634 (Molecular Probe), to horse radish peroxidase (ECL anti-rabbit or anti-mouse IgG Horseradish Peroxidase Linked whole antibody, GE Healthcare, and Peroxidase-conjugated AffiniPure Donkey Anti-Goat IgG, Jackson Immuno research), or to biotin (Vector Laboratories).

| Antibody             | source            | number           | host       |
|----------------------|-------------------|------------------|------------|
| TLS-M                | Doi et al. 2008   | -                | rabbit     |
| TLS-C                | Doi et al. 2008   | -                | rabbit     |
| EWS-M                | Doi et al. 2008   | -                | rabbit     |
| TAF15-M              | Doi et al. 2008   | -                | rabbit     |
| UBQLN2               | Doi et al. 2004   | -                | rabbit     |
| hnRNP A1 (9H10) :    | Santa Cruz        | sc-56700         | mouse      |
| NMDAR1 (NR1-CT)      | upstate           | 06-311           | rabbit     |
| PSD95                | Abcam             | ab18258          | rabbit     |
| DDX5                 | Abcam             | ab10261          | goat       |
| alpha-tubulin        | Sigma             | T9026            | mouse      |
| gamma-tubulin (C-20) | Santa Cruz        | sc-7396          | goat       |
| Htt (EM48)           | Millipore         | MAB5374          | mouse      |
| HSC70 (K-19)         | Santa Cruz        | sc-1059          | goat       |
| Sqstm1               | Progen            | GP62-C           | Guinea pig |
| Sqstm1               | MBL               | PM045            | rabbit     |
| TDP43                | Proteintech Group | BC001487 10782-1 | rabbit     |
| Htt 2B4 (polyP)      | Millipore         | MAB5492          | mouse      |
| TLS 4H11             | Santa Cruz        | sc-47711         | mouse      |
| GFP                  | Molecular Probe   | A6455            | rabbit     |

|                     |            |                |        |
|---------------------|------------|----------------|--------|
| GFP                 | Roche      | 11 814 460 001 | mouse  |
| GFP                 | MBL        | 598            | Rabbit |
| DDDDK-tag (Flag)    | MBL        | M185-3L        | mouse  |
| AR (N-20)           | Santa Cruz | sc-816         | rabbit |
| AR (H-280)          | Santa Cruz | sc-13062       | rabbit |
| AR                  | Everest    | EB06441        | goat   |
| polyglutamine (1C2) | Chemicon   | MAB1574        | mouse  |
| LaminB (M-20)       | Santa Cruz | sc-6217        | goat   |
| AAK1                | Abcam      | Ab173329       | rabbit |
| TRK-fused (TFG)     | Abcam      | Ab150428       | rabbit |
| CBP                 | Sigma      | SAB4500455     | rabbit |
| FUS/TLS             | Sigma      | HPA008784      | rabbit |
| Rad23b (C-4)        | Santa Cruz | sc-166507      | mouse  |
| Ubiquitin           | Chemicon   | MAB1510        | mouse  |

## Quantitative PCR (qPCR)

The sequences of primers are listed as follows.

| Name              | sequence (5'-3')                | Name         | sequence (5'-3')         |
|-------------------|---------------------------------|--------------|--------------------------|
| RT-Tis-3UTR-Fw    | CCCAGTGTACCTTGTATTTTGT          | RT-Ews-Fw    | CAATCCGGGCTGTGGAAA       |
| RT-Tis-3UTR-Rv    | CCCCCAAAAAAAAAATATCCA           | RT-Ews-Rv    | GCCTTACTACTGGTTGCATTCTG  |
| RT-hAR-Fw         | GCTGCACCGACCGTGAGT              | RT-Rad9b-Fw  | TGTATTTCCAAGACAGCCAGCCCT |
| RT-hAR-Rv         | GTTCGTGTCGCCGGCC                | RT-Rad9b-Rv  | TGTCAGAAGAGCAATGGCCTCAGT |
| RT-hHtt-ex1-Fw    | GCTGCACCGACCGTGAGT              | RT-Casp9-Fw  | TCTTCACGCGCGACATGA       |
| RT-hHtt-ex1-Rv    | GTTCGTGTCGCCGGCC                | RT-Casp9-Rv  | CCGCCGAGACCCAGATC        |
| RT-Htt-int1-probe | FAM-CAGCTCCCTGTCCCGCGG-ZEN/IBFQ | RT-Myo7a-Fw  | CGAGGGATTACGCTTTTTTG     |
| RT-Gdpd3-Fw       | GGGTCAGACCGGCACATG              | RT-Myo7a-Rv  | CAGTCTGTCAGGTGTCGGACAA   |
| RT-Gdpd3-Rv       | CATGGGAGTCCTTGAAATTTTC          | RT-Gabra2-Fw | GCCGAATGTCCCATGCA        |
| RT-Cort-Fw        | TGTCCAAGAGCCAGGAAAGG            | RT-Gabra2-Rv | GGGCATGAATGAGCATCCAT     |
| RT-Cort-Rv        | TCTTGCAGGGCTTTTTATCCA           | RT-Igfals-Fw | GGGCTCAGTCACCTTTGG       |
| RT-Miip-Fw        | AGAGCAGCGGTGTGGAAGA             | RT-Igfals-Rv | CGTGTCAGGCAGGACCACTA     |
| RT-Miip-Rv        | GCCGGCGGTTGATACG                | RT-Zfp69-Fw  | TGTCAGTGGCAGGATATCAACTTT |
| RT-Arnt2-Fw       | TGGTCCACTGCACAGTTACA            | RT-Zfp69-Rv  | GGTCCCTCTCCTTTTTCCAAC    |
| RT-Arnt2-Rv       | TTCTTCGGGTATGGTCATTCCT          | RT-Masp2-Fw  | CGCTGCGCCTCTACTTC        |

|               |                           |              |                        |
|---------------|---------------------------|--------------|------------------------|
| RT-Hrh3-Fw    | GCCACTGCTATGCTGAGTTCTTCT  | RT-Masp2-Rv  | TCATACTCGCAGCGGTAAGAGA |
| RT-Hrh3-Rv    | AAGAAGGTAACGCTGAGGAAGGGT  | RT-Gm7609-Fw | CAAGGAATGCGGGCCTTAC    |
| RT-Taf15-Fw   | TCAAAACCAACAGTCTTACCATTCA | RT-Gm7609-Rv | CCCCAAATACCAGCCAACAC   |
| RT-Taf15-Rv   | CACGACGGTCATCTTGTGTGT     |              |                        |
| RT-Hnrnpa1-Fw | GGGTTTGTACATATGCCACTGT    |              |                        |
| RT-Hnrnpa1-Rv | CCACCTTGTGTGGTCTTGCA      |              |                        |

### Biochemical analysis of mouse tissues

Total lysates were prepared as described <sup>9</sup>. All extraction buffers were supplemented with 1 × complete protease inhibitor cocktail (Roche) and pre-chilled on ice, except for those containing 2% SDS. For fractionation analysis shown in Supplementary Fig. S1B and S1C, cerebrum of 24-week-old wild-type or transgenic HD190QG mice were homogenized in hypotonic buffer [10 mM HEPES (pH7.9), 1.5 mM MgCl<sub>2</sub>, 10 mM KCl]. NP-40 was added to the homogenate to a final concentration of 0.5 % and incubated on ice for 30 minutes. The homogenate was centrifuged at 20000 × g for 15 minutes. The supernatant was collected and designated as Cyto. The pellet was suspended in PBS and treated with Benzonase nuclease (Merck Millipore) at 4°C for 3 h. The mixture was centrifuged at 20000 × g for 15 minutes and the supernatant was collected and designated as S1. Nuclear extraction buffer (NE) [20mM HEPES (pH7.9), 1.5 mM MgCl<sub>2</sub>, 0.42M NaCl, 25% glycerol] was added to the pellet fraction and incubated on ice for 30 minutes with brief vortex mixing every 10 minutes. The mixture was centrifuged at 20000 × g for 15 minutes and the supernatant was collected as NE1. By repeating NE extraction twice more, we obtained the resultant supernatants designated as NE2 and NE3. Then, the pellet was washed once with NE, which was collected as Wash (W). To the pellet, RIPA buffer [50 mM Tris-HCl (pH 8.0), 150 mM NaCl, 1% Triton X-100, 0.5% sodium deoxycholate, 1mM EDTA (pH 8.0)] was added and briefly sonicated using Branson Sonifier for 10 seconds three times at the setting of

7 on ice. The mixture was centrifuged at  $20000 \times g$  for 15 minutes and the supernatant was collected and designated as S2. RIPA supplemented with 2% SDS (RIPA/2%SDS) was added to the pellet and sonicated for 10 seconds three times at room temperature. The mixture was centrifuged at  $20000 \times g$  for 15 minutes and the supernatant was collected as S3. The remaining pellet was suspended in RIPA/2% SDS by sonication and designated as Ppt. The samples were subjected to AGERA.

### **Immunoprecipitation using Flag-TLS**

Flag-tagged FUS/TLS was made by inserting the murine TLS coding sequence amplified by PCR into the NotI-XbaI sites of p3xFlag-CMV-7.1 (Sigma-Aldrich). EGFP-AR(tr)23Q and EGFP-AR(tr)99Q were co-transfected with Flag-TLS into the N2a cells. 48hours post-transfection, cells were harvested and subjected to immunoprecipitation using anti-Flag-M2 agarose affinity gel (Sigma-Aldrich) in RIPA buffer. After washed with RIPA containing 500mM NaCl five times, immunoprecipitates were eluded by boiling in the 1x SDS sample buffer and subjected to Western blot analysis.

## **Supplementary Tables** (See separate Excel file)

**Table S1.** Protein components of Htt aggregates identified from mass analysis.

Proteins were eluted from immunoprecipitates of HD190QG transgenic mice and were subjected to LC-MS/MS analysis. Identified proteins are listed. Proteins with a Mascot score of at least 60 were selected. "Matches" indicate the total number of matched peptides including overlaps.

**Table S2.** Gene expression analysis of HD and SBMA mice.

Gene expression changes detected using ExonArray and AltAnalyze. Genes that were altered 1.2-fold at a raw P value of  $<0.005$  are listed.

**Table S3:** RNA processing analysis of HD and SBMA mice.

RNA processing changes detected using ExonArray and AltAnalyze. Exons that were altered by FIRMA fold change  $>2.0$  at a raw P value of  $<0.005$  are listed. Spread sheet modified from AltAnalyze.

## Supplementary Figure S1

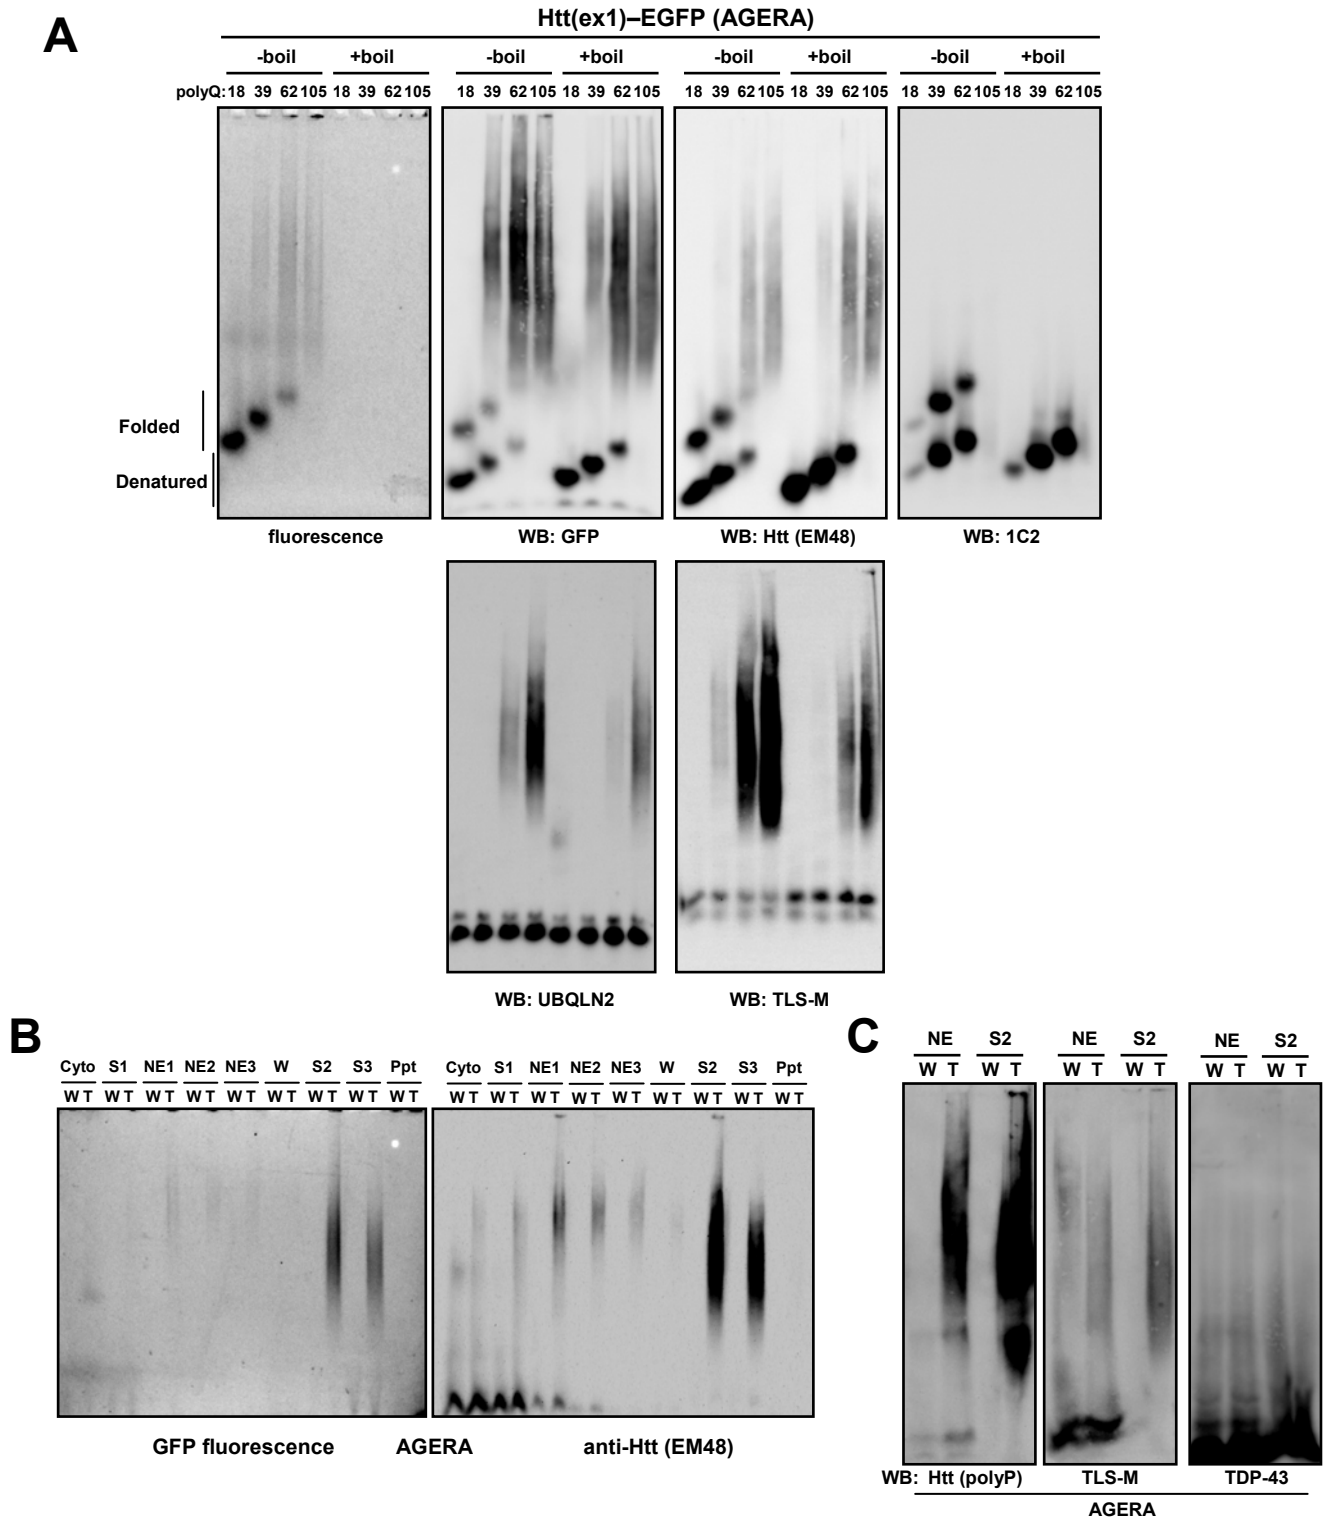

**Figure S1.** Agarose gel analysis of Htt aggregates in N2a cells and HD190QG mice.

**(A)** Agarose gel analysis of aggregates (AGERA) of Htt exon1 fused with EGFP with different polyQ lengths. 2% SDS-containing total lysate of N2a cells expressing indicated proteins with or without heat treatment were subjected to agarose gel electrophoresis. The fluorescence of EGFP was monitored. Then, the proteins were transferred onto a PVDF membrane and detected by indicated antibodies. EGFP fluorescence was at least in part preserved in 2% SDS-containing buffer but completely eliminated by heat treatment, which also altered migration pattern of monomeric proteins. FUS/TLS co-migrated with GFP-containing aggregates even after heat treatment. While anti-GFP and EM48 stained smear of aggregates, 1C2 did not stained these protein populations, suggesting that polyQ tract of aggregates are inaccessible because of protein-protein interactions. **(B)** AGERA of HD190QG-derived fractions. EGFP fluorescence (left panel) and immunostaining (right panel) are shown. W: wild type and T: transgenic animals. **(C)** AGERA of NE and S2 fractions from HD190QG and control mice stained with Htt, TLS-M or TDP43 antibody.

## Supplementary Figure S2

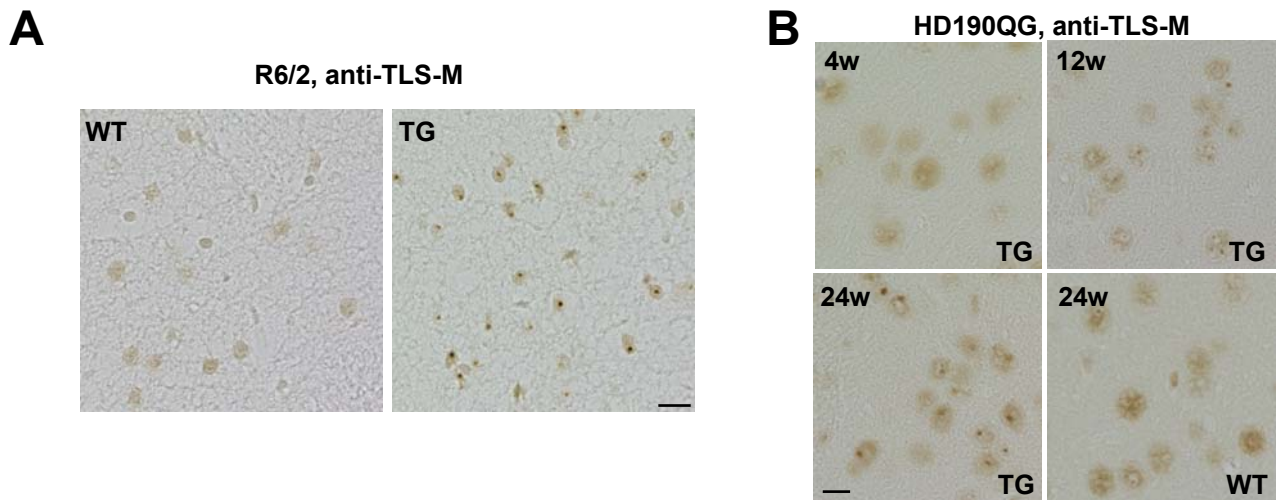

**Figure S2.** Immunohistochemical analysis of HD model mice.

**(A)** FUS/TLS-positive inclusions in the R6/2 striatum. Sections from a wild type (WT) mouse and a transgenic (TG) mouse were stained with anti-TLS-M antibody. Scale bar: 10  $\mu$ m. **(B)** Staining of FUS/TLS in the striatal sections of HD190QG mice using anti-TLS-M. Scale bar: 10  $\mu$ m.



## Supplementary Figure S3

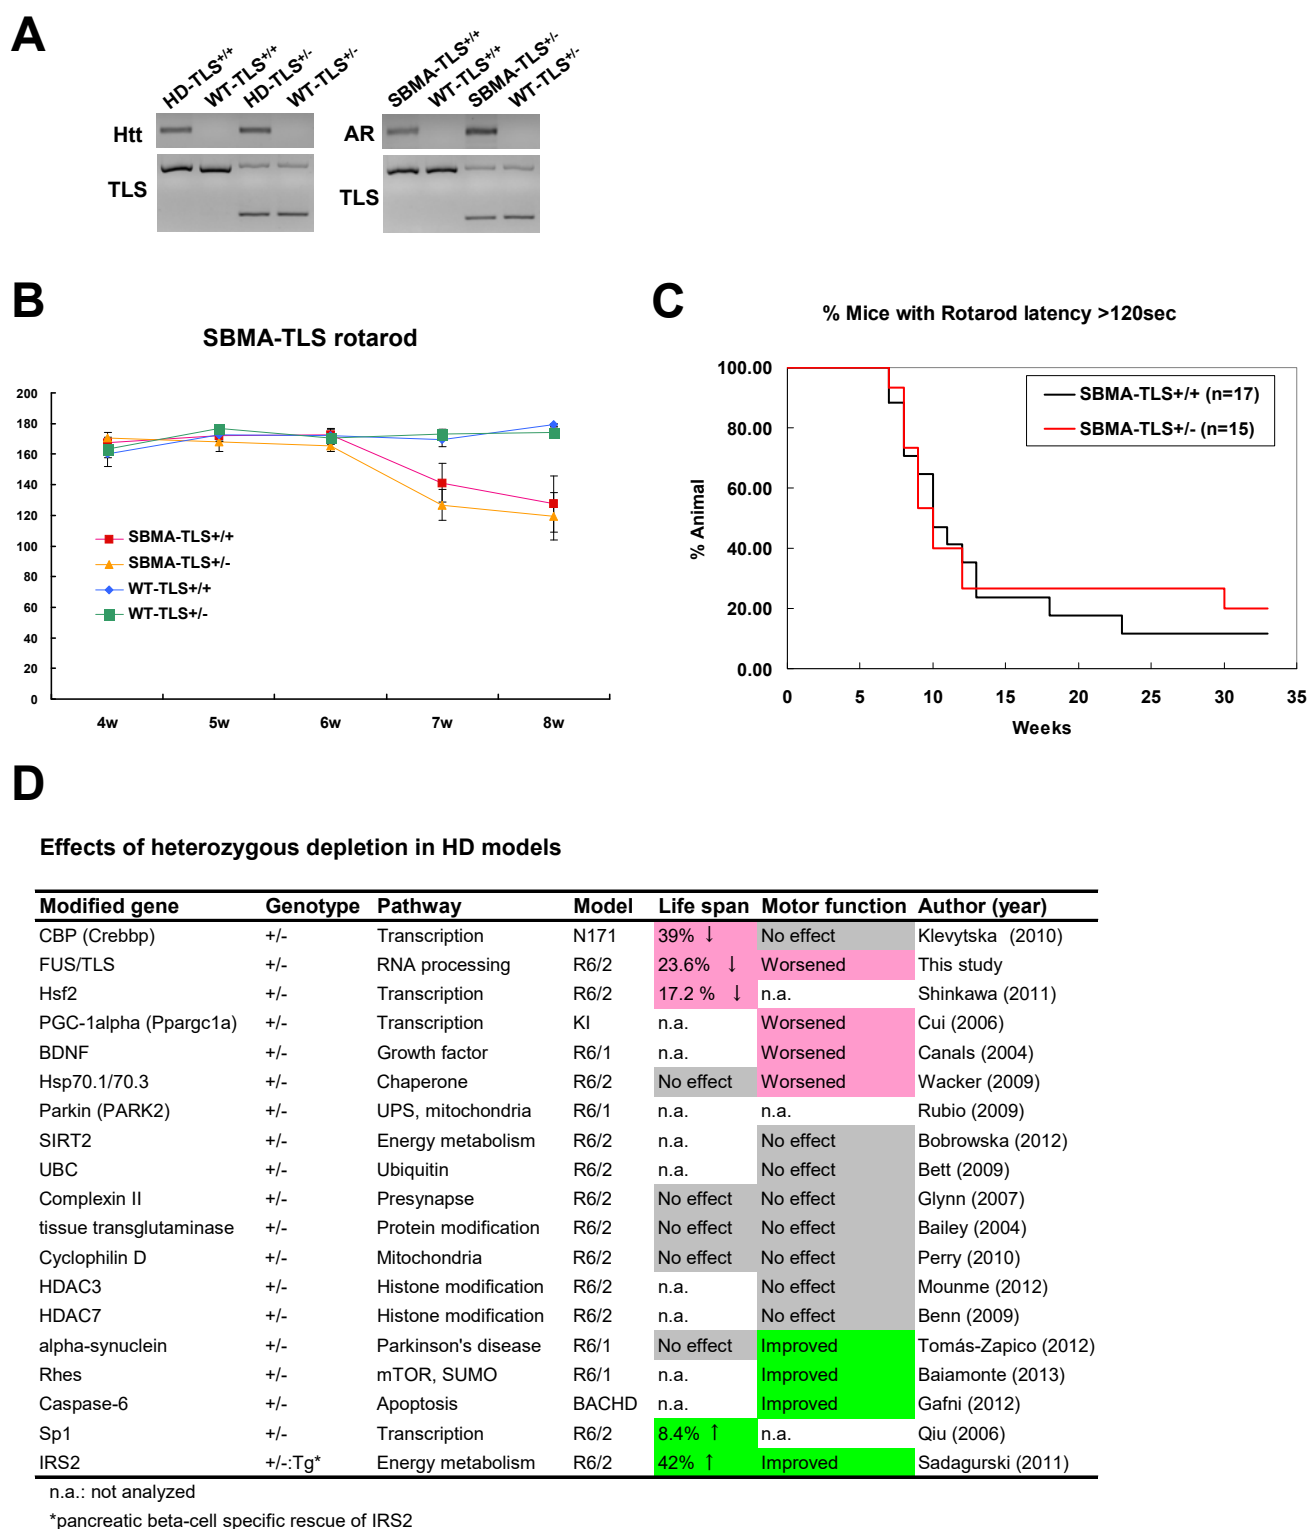

**Figure S3.** Rotarod analysis of SBMA-TLS mice and a summary of genetic interaction of HD model mice.

(A) PCR genotyping of animals obtained by genetic crossing. (B) Rotarod analysis of SBMA-TLS crossed mice. SBMA mice showed reduced performance regardless of FUS/TLS genotypes. Mean  $\pm$  SEM, n=17 for SBMA-TLS<sup>+/+</sup>, n=15 for SBMA-TLS<sup>+/-</sup>, n=16 for WT-TLS<sup>+/+</sup> and WT-TLS<sup>+/-</sup>. (C) Fraction of mice showing rotarod performance with >120 seconds on the rod at different time points. (D) Summary of HD mouse genetic experiments using heterozygous knockout animals. KI: knock-in.

## Supplementary Figure S4

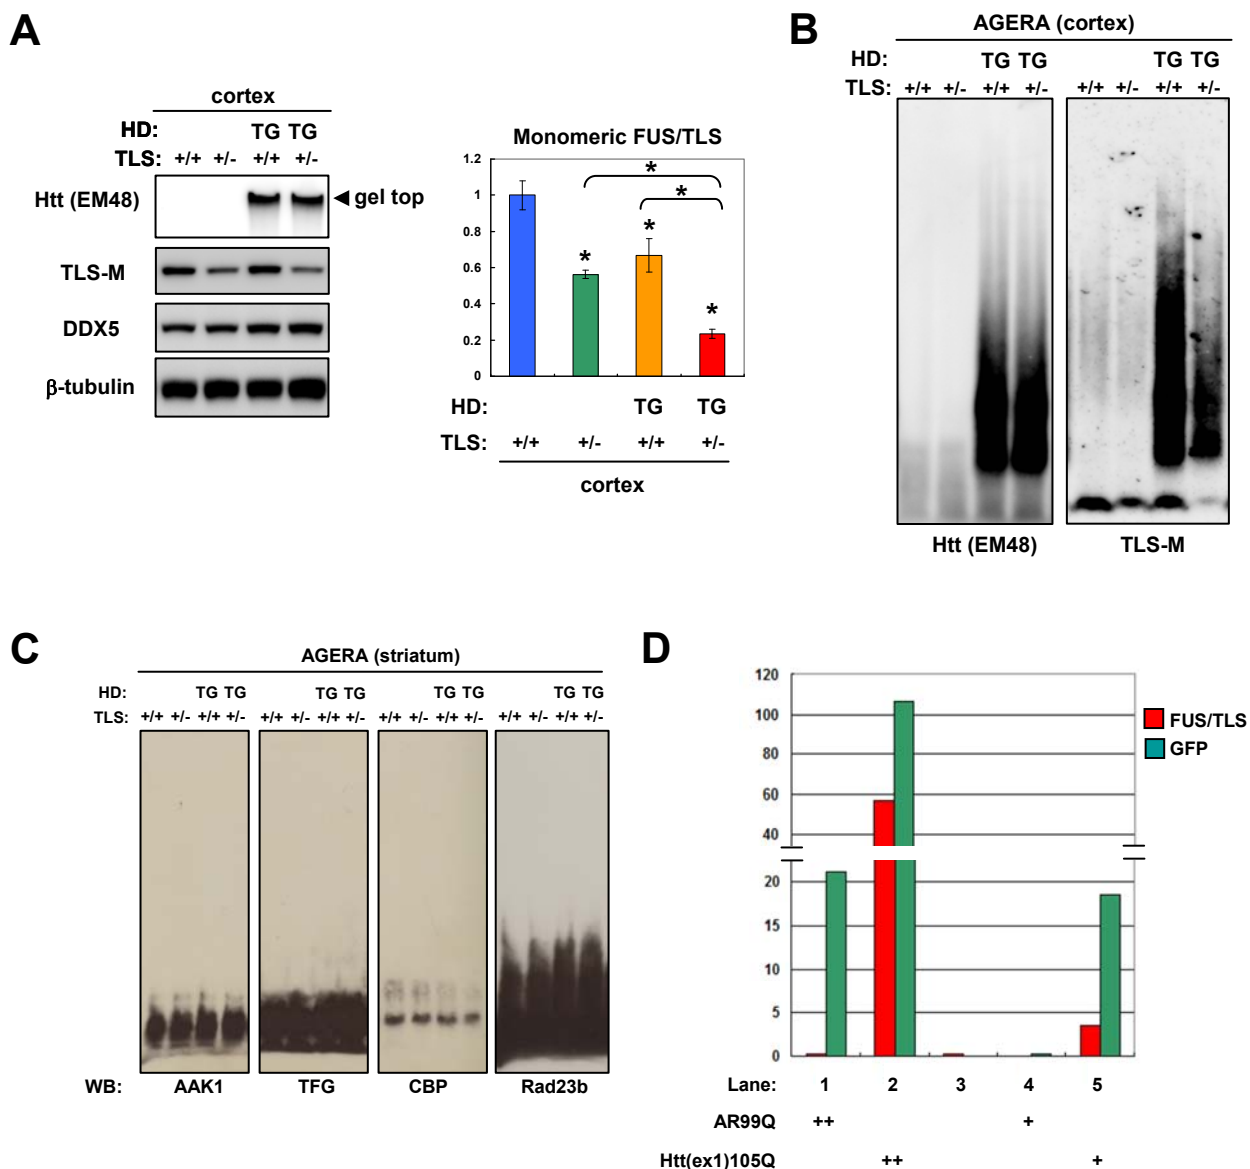

**Figure S4.** Protein analysis of Htt aggregates in HD-TLS crossed mice.

(A) SDS-PAGE analysis of cerebral cortex samples from 8-week-old TLS-HD crossed mice (left). Quantified results of the amount of monomeric FUS/TLS normalized by DDX5 (right). Bars represent mean  $\pm$  SEM (n=3). \*P<0.05 in comparison with WT-TLS<sup>+/+</sup> or indicated comparisons by a Tukey's test (n=3). (B) AGERA analysis of cerebral cortex samples from 8-week-old TLS-HD crossed mice. Western blot was performed using antibodies indicated. (C) AGERA analysis of striatum samples from 8-week-old TLS-HD crossed mice. Western blot was performed using antibodies indicated. (D) Quantification of proteins at the gel-top aggregates in Fig. 4B. Bars indicate protein amounts determined by the Western blot densitometry at the gel top (arbitrary unit).

## Supplementary Figure S5

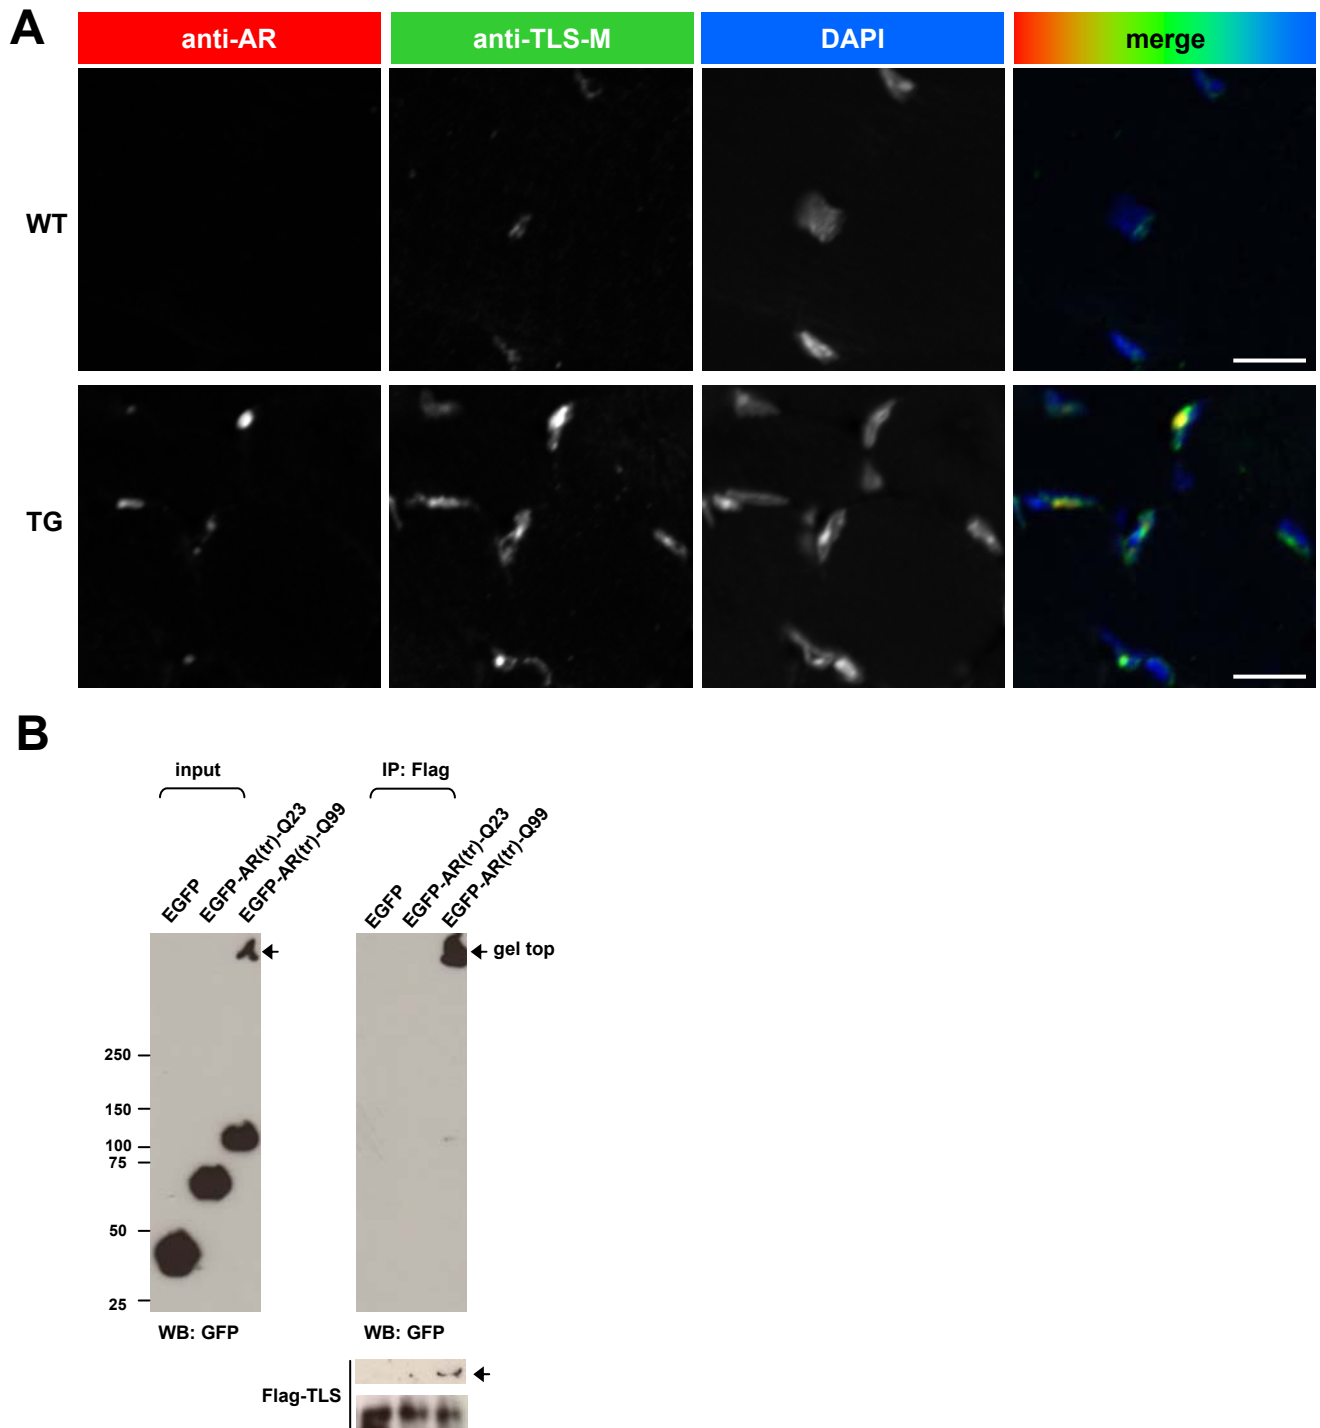

**Figure S5.** Interaction between mutant AR and FUS/TLS.

**(A)** Colocalization of FUS/TLS and AR inclusions in the skeletal muscle of SBMA model mice at 8 weeks. Sections of wild type (WT) and transgenic (TG) mice were stained with anti-TLS-M antibody (green) and goat anti-AR antibody (red). Nuclei were stained with DAPI. Representative confocal images are shown. Scale bar = 10  $\mu$ m. **(B)** Co-immunoprecipitation of EGFP-fused AR and Flag-tagged FUS/TLS in N2a cells. EGFP-AR fragments were co-transfected with Flag-TLS. Cell lysate of transfected cells were subjected to immunoprecipitation using anti-Flag antibody. We detected aggregated EGFP-AR(tr)-99Q in the eluted fraction. Arrows indicate the gel top.

## Supplementary Figure S6

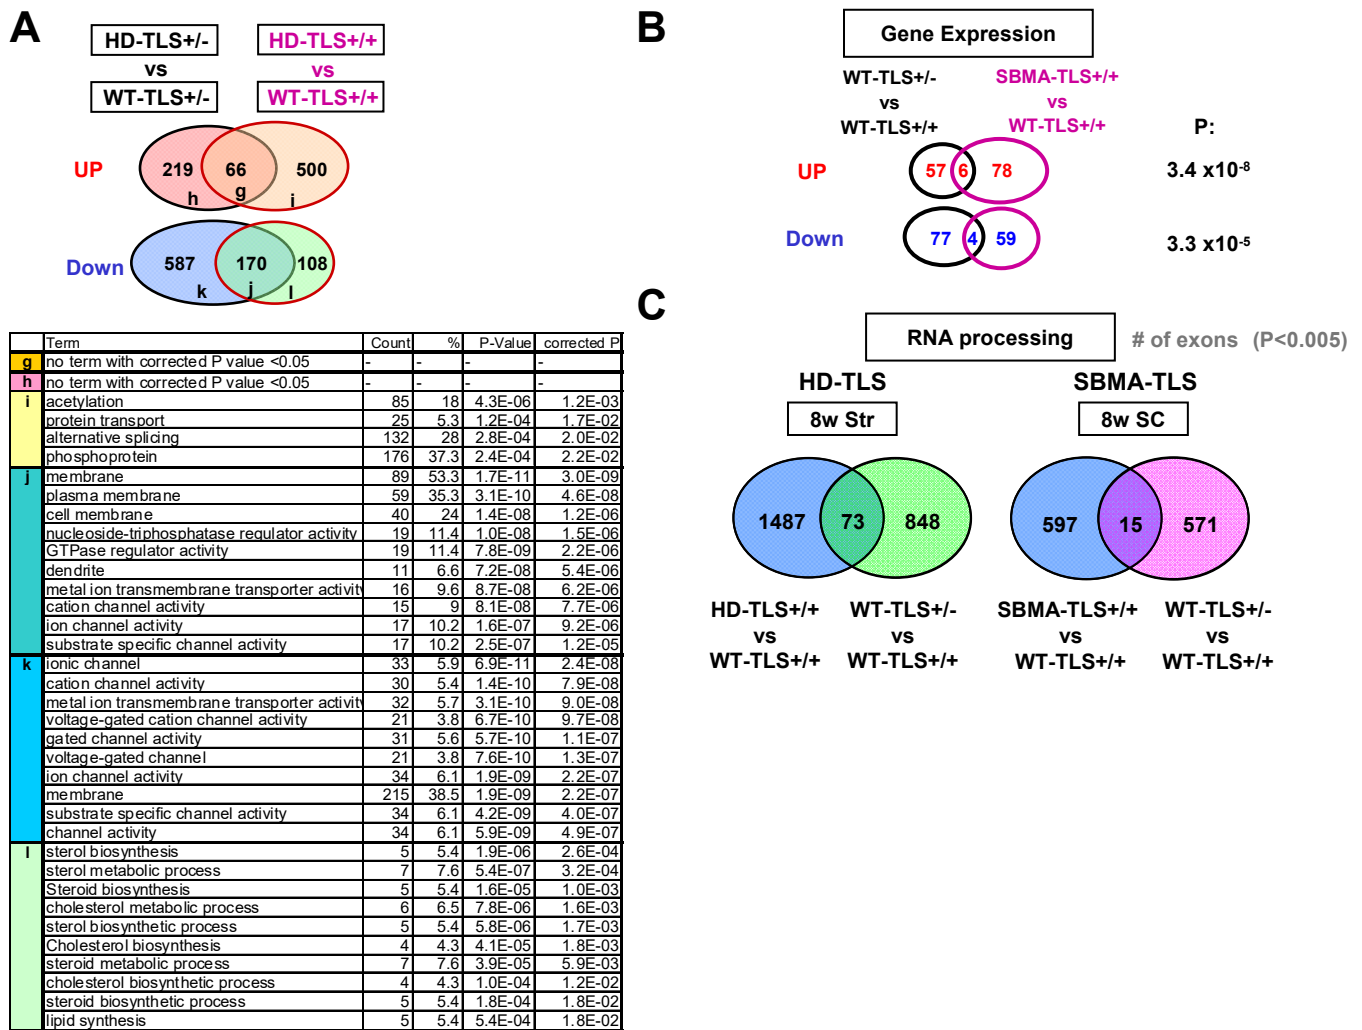

**Figure S6.** Transcriptome analysis of HD-TLS and SBMA-TLS mice.

(A) Comparison of genes altered in the striatum between HD-TLS<sup>+/-</sup> and WT-TLS<sup>+/-</sup> and those altered between HD-TLS<sup>+/+</sup> and WT-TLS<sup>+/+</sup>. Venn diagrams show the number of genes. Lowercase letters indicate groups of genes in the diagram. Mean ± SEM (n=3). Bottom list shows the results of gene ontology analysis of gene groups using DAVID. Terms with a corrected P value <0.05 are shown. (B) Overlaps of genes differentially regulated in the spinal cord of SBMA-TLS mice (raw P value <0.005, 1.2 fold). Comparisons were conducted as in Figure 4C. (C) Overlaps of exons differentially regulated in WT-TLS<sup>+/+</sup> vs WT-TLS<sup>+/-</sup> and HD(SBMA)-TLS<sup>+/+</sup> vs WT-TLS<sup>+/+</sup> (raw P value <0.005 in AltAnalyze). Str: striatum, SC: spinal cord.
